# Supplementary material for: The Business Case for Expanded Clozapine Utilization
Source: Atypon-hosted journal article supplement (doi:10.1176/appi.ps.201500507), 2016-06-15
Supplement: appi.ps.201500507.ds001.pdf [file appi.ps.201500507.ds001.pdf]

**Online Supplemental Material****Studies included in meta-regression**

| Author                    | Year | Response % | Total | Trial Length(wks) | Comments                                                                                       |
|---------------------------|------|------------|-------|-------------------|------------------------------------------------------------------------------------------------|
| Small <sup>19</sup>       | 1987 | 40%        | 38    |                   | Treatment-resistant schizophrenia and non-treatment-resistant schizophrenia - 55% response     |
| Kane <sup>4</sup>         | 1988 | 30%        | 134   | 6                 |                                                                                                |
| Mattes <sup>20</sup>      | 1989 | 57%        | 14    | Up to 104         | Based on 8 did substantially better on clozapine                                               |
| Davidson <sup>21</sup>    | 1993 | 50%        | 28    | 5                 |                                                                                                |
| Kuoppasalmi <sup>22</sup> | 1993 | 67%        | 103   | 26                | Based on statement "More than 2/3 improved"                                                    |
| Breier <sup>23</sup>      | 1993 | 60%        | 30    | 26                |                                                                                                |
| Littrel <sup>24</sup>     | 1994 | 48%        | 42    | 12                |                                                                                                |
| Lieberman <sup>25</sup>   | 1994 | 50%        | 66    | 52                | Treatment-resistant schizophrenia+ additional 18 patients not tolerant of other antipsychotics |
| Szymanski <sup>26</sup>   | 1994 | 30%        | 10    |                   |                                                                                                |
| Honer <sup>27</sup>       | 1995 | 31%        | 61    | 32                |                                                                                                |
| Grace <sup>28</sup>       | 1996 | 50%        | 31    | 52                |                                                                                                |
| Hoff <sup>29</sup>        | 1996 | 14%        | 30    | 12                |                                                                                                |
| Wilson <sup>30</sup>      | 1996 | 73%        | 100   | 48                | All improved within 1 week but followed weekly X 18 weeks the every 3 months for 18 months     |

|                         |      |            |             |    |                                                                                                       |
|-------------------------|------|------------|-------------|----|-------------------------------------------------------------------------------------------------------|
| Aymard <sup>31</sup>    | 1997 | 100%       | 7           |    | 4-38 months follow-up                                                                                 |
| Conley <sup>32</sup>    | 1997 | 68%        | 50          |    | Mean follow up 75 weeks<br>All responders responded within 8 weeks                                    |
| Aitchison <sup>33</sup> | 1997 | 85%        | 26          |    |                                                                                                       |
| Rosenheck <sup>34</sup> | 1996 | 57%        | 205         | 52 | Hospital days reduced from 168.1 to 143.8                                                             |
| Blieden <sup>35</sup>   | 1998 | 52%        | 33          | 26 |                                                                                                       |
| Luchins <sup>36</sup>   | 1998 | 75%        | 28          |    | Cost study, hospital days reduced from 23.5 to 7.6                                                    |
| Sajatovic <sup>37</sup> | 1998 | 30%        | 97          | 60 |                                                                                                       |
| Buckman <sup>38</sup>   | 1999 | 47%        | 518         | 60 | Cost Study                                                                                            |
| Percudani <sup>39</sup> | 1999 | 80%        | 15          | 52 | Cost Study                                                                                            |
| Rosenheck <sup>40</sup> | 1999 | 39%        | 122         | 26 | Response at 26 weeks                                                                                  |
| Simpson <sup>41</sup>   | 1999 | 19%        | 48          |    | 48 completed 16 weeks, 36 went on to 2 <sup>nd</sup> and 3 <sup>rd</sup> 16week trials at other doses |
| Dettling <sup>42</sup>  | 2000 | 81%        | 26          | 10 |                                                                                                       |
| Sajatovic <sup>43</sup> | 2000 | 58%        | 522         | 60 |                                                                                                       |
| Wahlbeck <sup>44</sup>  | 2000 | 50%        | 10          | 10 | 50% dropout                                                                                           |
| Kane <sup>45</sup>      | 2001 | 57%        | 37          | 29 |                                                                                                       |
| Narendran <sup>46</sup> | 2003 | 67%        | 9           | 6  |                                                                                                       |
| Honer <sup>47</sup>     | 2006 | 26%        | 34          | 8  | Already clozapine poor responders                                                                     |
| Semiz <sup>48</sup>     | 2007 | 56%        | 97          | 16 |                                                                                                       |
| <b>Pooled Total</b>     |      | <b>51%</b> | <b>2571</b> |    |                                                                                                       |

\*calculate SD from p<0.001

## Online Supplemental Material

### Studies excluded from meta-regression

| Author                    | Year | Response % | Total | Trial Length(wks) | Comments                                                                                              |
|---------------------------|------|------------|-------|-------------------|-------------------------------------------------------------------------------------------------------|
| Kahn <sup>49</sup>        | 1993 | 47%        | 19    | 5                 | 8 responders 11 non-responders all improved                                                           |
| Jonsson <sup>50</sup>     | 1995 | 70%        | 21    | 78                | 15 patients showed "substantial response"                                                             |
| Kronig <sup>51</sup>      | 1995 | 40.5%      | 45    | 6                 | "responders" more likely to have serum concentration >350ng/ml                                        |
| VanderZwaag <sup>52</sup> | 1996 | *          | 28    | 12                | 39% (18) low; 61% (23) med; 60% (15) high concentration groups responded                              |
| Lindenmayer <sup>53</sup> | 1998 | *          | 35    | 12                | No overall response metric                                                                            |
| Semyak <sup>54</sup>      | 2001 | *          | 1415  | 36                | Response rate not defined<br>Unclear if treatment-resistant schizophrenia population                  |
| Umbricht <sup>55</sup>    | 2002 | 59%        | 37    | 29                | Secondary analysis of patients in Kane trial <sup>45</sup>                                            |
| Saccchetti <sup>56</sup>  | 2009 | *          | 74    | 18                | Significant response noted on PANSS but no response rate for treatment-resistant schizophrenia (n=65) |

## Online Supplemental Material

### Inpatient hospital days with clozapine use<sup>+</sup>

| Author                   | Year | Clozapine<br>(N) | Clozapine<br>Inpatient Days<br>(SD) | Comparator<br>(N) | Comparator<br>Inpatient Days<br>(SD) |
|--------------------------|------|------------------|-------------------------------------|-------------------|--------------------------------------|
| Aitchison <sup>33*</sup> | 1997 | 26               | 6.5 ± 6.5                           | 26                | 39.5 ± 39.5                          |
| Ghaemi <sup>68</sup>     | 1998 | 20               | 4.6 ± 11.3                          | 20                | 47.7 ± 20                            |
| Rosenheck <sup>34*</sup> | 1996 | 205              | 143.8 ± 143.8                       | 218               | 168.1 ± 168.1                        |
| Luchins <sup>36</sup>    | 1998 | 28               | 7.6 ± 14.9                          | 28                | 23.5 ± 49.6                          |
| Buckman <sup>38*</sup>   | 1999 | 243              | 70.8 ± 70.8                         | 243               | 152.9 ± 152.9                        |
| Percudani <sup>39*</sup> | 1999 | 12               | 58.8 ± 58.8                         | 12                | 107.8 ± 58.8                         |
| Atkinson <sup>69</sup>   | 2007 | 23               | 74.1 ± 137.3                        | 23                | 119.8 ± 143.5                        |

<sup>+</sup> SD assumed to equal the mean inpatient days if not otherwise specified

\*calculate SD from p<0.001



**Figure 2: Contribution of inputs to variation in clozapine cost of care.\***

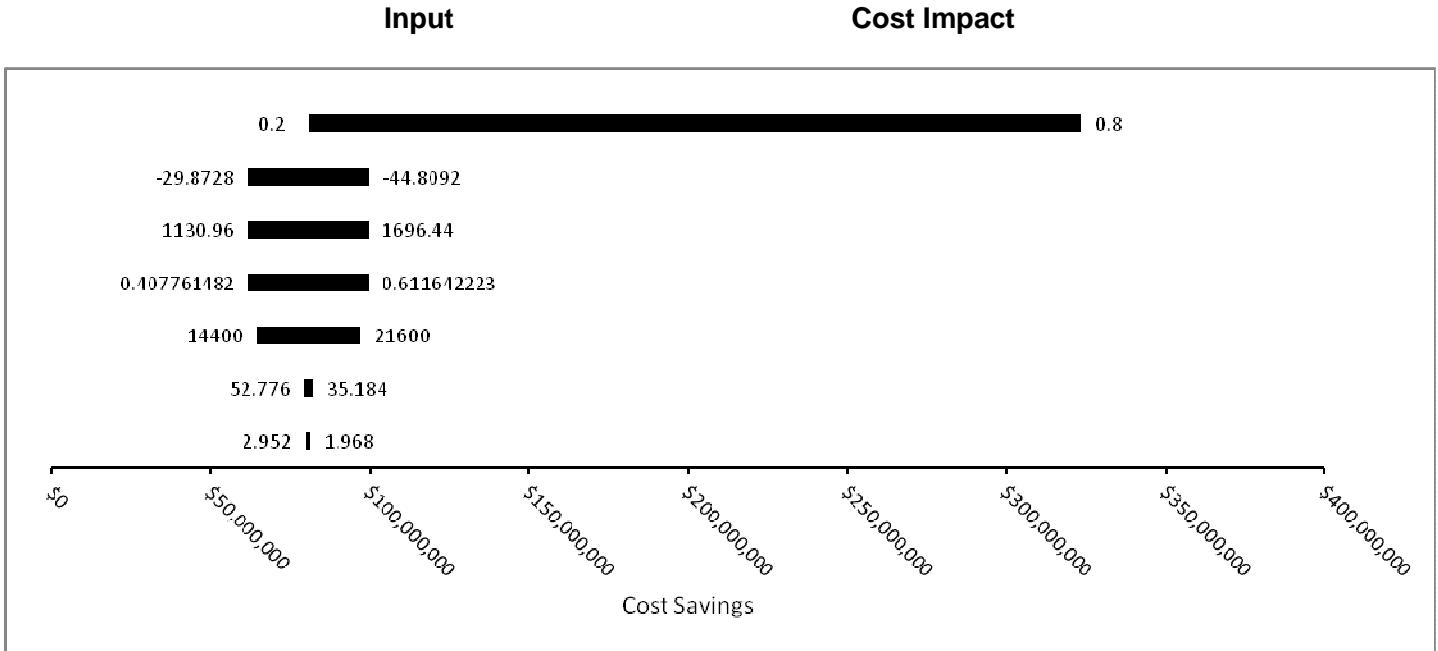

\*Other variables (rates of adverse drug reactions (ADRs), suicide, clozapine discontinuation, costs of ADRs, and laboratory monitoring) each had a smaller impact than the cost of clozapine.
