# Supplementary material for: The Business Case for Expanded Clozapine Utilization
Source: Atypon-hosted journal article supplement (doi:10.1176/appi.ps.201500507), 2016-06-15
Supplement: appi.ps.201500507.ds001.pdf [file appi.ps.201500507.ds001.pdf]

 


Psychiatry Online
